# Supplementary material for: Comprehensive Characterization of the Coding and Non-coding Single Nucleotide Polymorphisms in the Tumor Protein p63 (TP63) Gene Using In Silico Tools.
Source: Research Square preprint supplement (doi:10.21203/rs.3.rs-265434/v1), 2021-03-04
Supplement: Supplementary file 1 [file b7a6010e8440b6704878c79e.docx]

**Supplementary Tables and Figures**

**Comprehensive Characterization of the Coding and Non-coding Single Nucleotide Polymorphisms in the Tumor Protein p63 (*TP63)* Gene Using In silico Tools**

Shamima Akter1, Shafaat Hossain2, Md. Ismail Hosen2, Hossain Uddin Shekhar2*

1 Department of Bioinformatics and Computational Biology, George Mason University, Fairfax, Virginia- 22030

2 Department of Biochemistry and Molecular Biology, University of Dhaka, Dhaka-1000, Bangladesh.

*Correspondence to: Dr. Hossain Uddin Shekhar, Professor, Department of Biochemistry and Molecular Biology, University of Dhaka, Dhaka-1000, Bangladesh, Email: [hossainshekhar@du.ac.bd](mailto:hossainshekhar@du.ac.bd)

**Table S1. Functional nsSNPs Prediction in TP63 in SIFT, PolyPhen2, CADD**

| **Variant ID** |  |  | **SNP** | **Source** | **Conseq.Type**  **(SNP type)** | **SIFT_class** | **PolyPhen2 class** | **CADD_class** |
| --- | --- | --- | --- | --- | --- | --- | --- | --- |
| rs1266601767 |  |  | D178Y | dbSNP | missense variant | deleterious | probably damaging | likely deleterious |
| rs866938979 |  |  | S189L | dbSNP | missense variant | deleterious | probably damaging | likely deleterious |
| rs1057517984 |  |  | Y202C | dbSNP | missense variant | deleterious | probably damaging | likely deleterious |
| rs121908849 |  |  | R266Q | dbSNP | missense variant | deleterious | probably damaging | likely deleterious |
| rs121908840 |  |  | R318H | dbSNP | missense variant | deleterious | probably damaging | likely deleterious |
| rs886039442 |  |  | R319H | dbSNP | missense variant | deleterious | probably damaging | likely deleterious |
| rs1320920860 |  |  | V325D | dbSNP | missense variant | deleterious | probably damaging | likely deleterious |
| rs753404887 |  |  | D331V | dbSNP | missense variant | deleterious | probably damaging | likely deleterious |
| rs1040062725 |  |  | G332R | dbSNP | missense variant | deleterious | probably damaging | likely deleterious |
| rs113993967 |  |  | R337Q | dbSNP | missense variant | deleterious | probably damaging | likely deleterious |
| rs1029852196 |  |  | R338H | dbSNP | missense variant | deleterious | probably damaging | likely deleterious |
| rs121908841 |  |  | R343Q | dbSNP | missense variant | deleterious | probably damaging | likely deleterious |
| rs1064793282 |  |  | C347F | dbSNP | missense variant | deleterious | probably damaging | likely deleterious |
| rs866267914 |  |  | G349E | dbSNP | missense variant | deleterious | probably damaging | likely deleterious |
| rs121908844 |  |  | D351G | dbSNP | missense variant | deleterious | probably damaging | likely deleterious |
| rs1553857889 |  |  | D355N | dbSNP | missense variant | deleterious | probably damaging | likely deleterious |
| rs757536818 |  |  | R376C | dbSNP | missense variant | deleterious | probably damaging | likely deleterious |
| rs761885185 |  |  | R379C | dbSNP | missense variant | deleterious | probably damaging | likely deleterious |
| rs765502786 |  |  | R379H | dbSNP | missense variant | deleterious | probably damaging | likely deleterious |
| rs1173679499 |  |  | R393Q | dbSNP | missense variant | deleterious | probably damaging | likely deleterious |
| rs1282887680 |  |  | R408C | dbSNP | missense variant | deleterious | probably damaging | likely deleterious |
| rs751698974 |  |  | R408H | dbSNP | missense variant | deleterious | probably damaging | likely deleterious |
| rs886039443 |  |  | F552C | dbSNP | missense variant | deleterious | probably damaging | likely deleterious |
| rs121908843 |  |  | C561G | dbSNP | missense variant | deleterious | probably damaging | likely deleterious |
| rs774221257 |  |  | L562R | dbSNP | missense variant | deleterious | probably damaging | likely deleterious |
| rs1172845743 |  |  | Y574C | dbSNP | missense variant | deleterious | probably damaging | likely deleterious |
| rs774550896 |  |  | R647H | dbSNP | missense variant | deleterious | probably damaging | likely deleterious |
| rs764601563 |  |  | R655Q | dbSNP | missense variant | deleterious | probably damaging | likely deleterious |

**Table S2. Analysis of nsSNPs using PROVEAN and ClinVar**

| **Variant ID** |  |  | **SNP** | **Source** | **PROVEAN score** | **PROVEAN impact** | **ClinVar result** |
| --- | --- | --- | --- | --- | --- | --- | --- |
| rs1266601767 |  |  | D178Y | dbSNP | -3.381 | Deleterious | not found |
| rs866938979 |  |  | S189L | dbSNP | -5.556 | Deleterious | not found |
| rs1057517984 |  |  | Y202C | dbSNP | -7.964 | Deleterious | Likely pathogenic |
| rs121908849 |  |  | R266Q | dbSNP | -3.612 | Deleterious | Pathogenic |
| rs121908840 |  |  | R318H | dbSNP | -4.645 | Deleterious | Pathogenic |
| rs886039442 |  |  | R319H | dbSNP | -4.627 | Deleterious | Pathogenic |
| rs1320920860 |  |  | V325D | dbSNP | -4.628 | Deleterious | not found |
| rs753404887 |  |  | D331V | dbSNP | -6.694 | Deleterious | not found |
| rs1040062725 |  |  | G332R | dbSNP | -5.704 | Deleterious | not found |
| rs113993967 |  |  | R337Q | dbSNP | -3.618 | Deleterious | Pathogenic |
| rs1029852196 |  |  | R338H | dbSNP | -4.523 | Deleterious | Uncertain significance |
| rs121908841 |  |  | R343Q | dbSNP | -3.663 | Deleterious | Pathogenic |
| rs1064793282 |  |  | C347F | dbSNP | -10.073 | Deleterious | Pathogenic |
| rs866267914 |  |  | G349E | dbSNP | -7.342 | Deleterious | Pathogenic |
| rs121908844 |  |  | D351G | dbSNP | -6.41 | Deleterious | Pathogenic |
| rs1553857889 |  |  | D355N | dbSNP | -3.512 | Deleterious | Pathogenic |
| rs757536818 |  |  | R376C | dbSNP | -3.65 | Deleterious | not found |
| rs761885185 |  |  | R379C | dbSNP | -2.648 | Deleterious | Uncertain significance |
| rs765502786 |  |  | R379H | dbSNP | -1.476 | Neutral | Uncertain significance |
| rs1173679499 |  |  | R393Q | dbSNP | -2.402 | Neutral | not found |
| rs1282887680 |  |  | R408C | dbSNP | -7.064 | Deleterious | not found |
| rs751698974 |  |  | R408H | dbSNP | -4.461 | Deleterious | not found |
| rs886039443 |  |  | F552C | dbSNP | -2.7 | Deleterious | Likely pathogenic |
| rs121908843 |  |  | C561G | dbSNP | -3.819 | Deleterious | Likely pathogenic |
| rs774221257 |  |  | L562R | dbSNP | -2.328 | Neutral | not found |
| rs1172845743 |  |  | Y574C | dbSNP | -2.828 | Deleterious | not found |
| rs774550896 |  |  | R647H | dbSNP | -2.062 | Neutral | not found |
| rs764601563 |  |  | R655Q | dbSNP | -1.246 | Neutral | not found |

**Table S3. Regulome DB results of non-coding SNPs**

| dbSNP IDs | Regulome DB Rank | Regulome DB Score | Type | Position in  respect to TP63 |
| --- | --- | --- | --- | --- |
| rs62290004 | 2a | 0.67948 | Intron Variant | Intron 1-2 |
| rs6774934 | 2a | 1 | Intron Variant | Intron 1-2 |
| rs11708278 | 2b | 0.68277 | Intron Variant | Intron 3-4 |
| rs1913721 | 2b | 0.43292 | Intron Variant | Intron 4-5 |
| rs1913722, rs57898901 | 2b | 0.62301 | Intron Variant | Intron 4-5 |
| rs4488809 | 2b | 0.57802 | Intron Variant | Intron 1-2 |
| rs4687090 | 2b | 0.43292 | Intron Variant | Intron 1-2 |
| rs55803942 | 2b | 0.46415 | Intron Variant | Intron 3-4 |
| rs56104635 | 2b | 0.70883 | Intron Variant | Intron 4-5 |
| rs6444404 | 2b | 0.50526 | Intron Variant | Intron 4-5 |
| rs6794898 | 2b | 0.67017 | Intron Variant | Intron 1-2 |
| rs6797174 | 2b | 0.93104 | Intron Variant | Intron 1-2 |
| rs79155799 | 2b | 0.55744 | Intron Variant | Intron 1-2 |
| rs79659066 | 2b | 0.69579 | Intron Variant | Intron 3-4 |
| rs9830137 | 2b | 0.70883 | Intron Variant | Intron 3-4 |
| rs9847745 | 2b | 0.63796 | Intron Variant | Intron 1-2 |
| rs10049472 | 2c | 0.49417 | Intron Variant | Intron 1-2 |
| rs4687085 | 2c | 0.42417 | Intron Variant | Intron 1-2 |
| rs6777728 | 2c | 0.9 | Intron Variant | Intron 4-5 |
| rs28673064 | 3a | 0.97433 | 5 prime UTR variant | 5 prime UTR |
| rs78233713 | 7 | 0.18412 | 3 prime UTR variant | 3 prime UTR |
| rs73199799 | 7 | 0.18412 | 3 prime UTR variant | 3 prime UTR |

**Table S4. miRNA binding site prediction of noncoding SNPs in TP63 protein through PolymiRTS**

| Location | dbSNP ID | Variant | Wobble | Ancestral | Allele | miR ID | Conservation | miRSite | Function | Exp | context+ |
| --- | --- | --- | --- | --- | --- | --- | --- | --- | --- | --- | --- |
| 189612062 | rs142981128 | SNP | Y | G | G | [hsa-miR-22-3p](http://www.mirbase.org/cgi-bin/mirna_entry.pl?acc=hsa-miR-22-3p) | [16](http://compbio.uthsc.edu/miRSNP/miRSNP_detail_all.php) | accaccGGCAGCT | D | N | -0.161 |
| [hsa-miR-138-5p](http://www.mirbase.org/cgi-bin/mirna_entry.pl?acc=hsa-miR-138-5p) | [14](http://compbio.uthsc.edu/miRSNP/miRSNP_detail_all.php) | acCACCAGCAgct | C | N | -0.35 |
| [hsa-miR-3692-5p](http://www.mirbase.org/cgi-bin/mirna_entry.pl?acc=hsa-miR-3692-5p) | [14](http://compbio.uthsc.edu/miRSNP/miRSNP_detail_all.php) | accaCCAGCAGct | C | N | -0.186 |
| [hsa-miR-4456](http://www.mirbase.org/cgi-bin/mirna_entry.pl?acc=hsa-miR-4456) | [13](http://compbio.uthsc.edu/miRSNP/miRSNP_detail_all.php) | aCCACCAGcagct | C | N | -0.192 |
| [hsa-miR-4722-5p](http://www.mirbase.org/cgi-bin/mirna_entry.pl?acc=hsa-miR-4722-5p) | [14](http://compbio.uthsc.edu/miRSNP/miRSNP_detail_all.php) | tctcatCTCCTGC | O | N | -0.168 |
| 189612196 | rs140149400 | SNP | Y | A | A | [hsa-miR-1273f](http://www.mirbase.org/cgi-bin/mirna_entry.pl?acc=hsa-miR-1273f) | [19](http://compbio.uthsc.edu/miRSNP/miRSNP_detail_all.php) | cagaCCATCTCtt | D | N | -0.149 |
| [hsa-miR-4527](http://www.mirbase.org/cgi-bin/mirna_entry.pl?acc=hsa-miR-4527) | [19](http://compbio.uthsc.edu/miRSNP/miRSNP_detail_all.php) | CAGACCAtctctt | D | N | -0.131 |
| [hsa-miR-6503-5p](http://www.mirbase.org/cgi-bin/mirna_entry.pl?acc=hsa-miR-6503-5p) | [19](http://compbio.uthsc.edu/miRSNP/miRSNP_detail_all.php) | CAGACCAtctctt | D | N | -0.131 |
| [hsa-miR-6753-3p](http://www.mirbase.org/cgi-bin/mirna_entry.pl?acc=hsa-miR-6753-3p) | [19](http://compbio.uthsc.edu/miRSNP/miRSNP_detail_all.php) | CAGACCAtctctt | D | N | -0.119 |
| [hsa-miR-7107-3p](http://www.mirbase.org/cgi-bin/mirna_entry.pl?acc=hsa-miR-7107-3p) | [19](http://compbio.uthsc.edu/miRSNP/miRSNP_detail_all.php) | CAGACCAtctctt | D | N | -0.116 |
| G | [hsa-miR-409-5p](http://www.mirbase.org/cgi-bin/mirna_entry.pl?acc=hsa-miR-409-5p) | [12](http://compbio.uthsc.edu/miRSNP/miRSNP_detail_all.php) | catatcGGTAACC | C | N | -0.073 |
| 189613717 | rs36099321 | SNP | N | C | C | [hsa-miR-184](http://www.mirbase.org/cgi-bin/mirna_entry.pl?acc=hsa-miR-184) | [10](http://compbio.uthsc.edu/miRSNP/miRSNP_detail_all.php) | gtttcCCGTCCAt | D | N | -0.135 |
| [hsa-miR-4804-5p](http://www.mirbase.org/cgi-bin/mirna_entry.pl?acc=hsa-miR-4804-5p) | [10](http://compbio.uthsc.edu/miRSNP/miRSNP_detail_all.php) | gtttcCCGTCCAt | D | N | -0.122 |
| [hsa-miR-4520a-3p](http://www.mirbase.org/cgi-bin/mirna_entry.pl?acc=hsa-miR-4520a-3p) | [10](http://compbio.uthsc.edu/miRSNP/miRSNP_detail_all.php) | gtttcCTGTCCAt | C | N | -0.011 |
| C | [hsa-miR-636](http://www.mirbase.org/cgi-bin/mirna_entry.pl?acc=hsa-miR-636) | [13](http://compbio.uthsc.edu/miRSNP/miRSNP_detail_all.php) | tggtaaCAAGCAC | C | N | -0.166 |
| 189614414 | rs36064124 | SNP | N | C | C | [hsa-miR-6892-5p](http://www.mirbase.org/cgi-bin/mirna_entry.pl?acc=hsa-miR-6892-5p) | [13](http://compbio.uthsc.edu/miRSNP/miRSNP_detail_all.php) | ctgctTCCCTTAc | D | N | -0.119 |
| 189614507 | [rs35861864](http://www.ncbi.nlm.nih.gov/SNP/snp_ref.cgi?rs=rs35861864) | SNP | Y | G | G | [hsa-miR-101-3p](http://www.mirbase.org/cgi-bin/mirna_entry.pl?acc=hsa-miR-101-3p) | [10](http://compbio.uthsc.edu/miRSNP/miRSNP_detail_all.php) | tGTACTGTgtctc | D | N | -0.086 |

**Table S5. PolymiRTS Results of noncoding SNPs for disease association**

| Disease/Trait | PubMedID | MarkerID | P_Value |
| --- | --- | --- | --- |
| Brain imaging | 20100581 | rs7610017 | NS |
| Lung cancer | 23143601 | rs4488809 | 0.000000004 |
| Lung cancer | 21725308 | rs4488809 | 7E-26 |
| Lung adenocarcinoma | 22797724 | rs10937405 | 7E-17 |
| Lung adenocarcinoma | 20871597 | rs10937405 | 7E-12 |
| Acute lymphoblastic leukemia (childhood) | 22076464 | rs17505102 | 0.000000009 |
| Acute lymphoblastic leukemia (childhood) | 22076464 | rs17505102 | 0.00000002 |
| Bladder cancer | 20972438 | rs710521 | 2E-10 |
| Urinary bladder cancer | 20348956 | rs710521 | 0.00000006 |
| Urinary bladder cancer | 18794855 | rs710521 | 0.0000001 |

Figure S1. SNP types and number of TP63


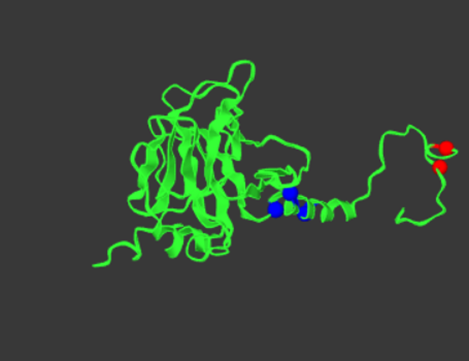


Figure S2. Mutations in protein structure. The positions of the SNPs are C347F, D355N, G349E, R376C, R408C, R408H, R379C, R379H


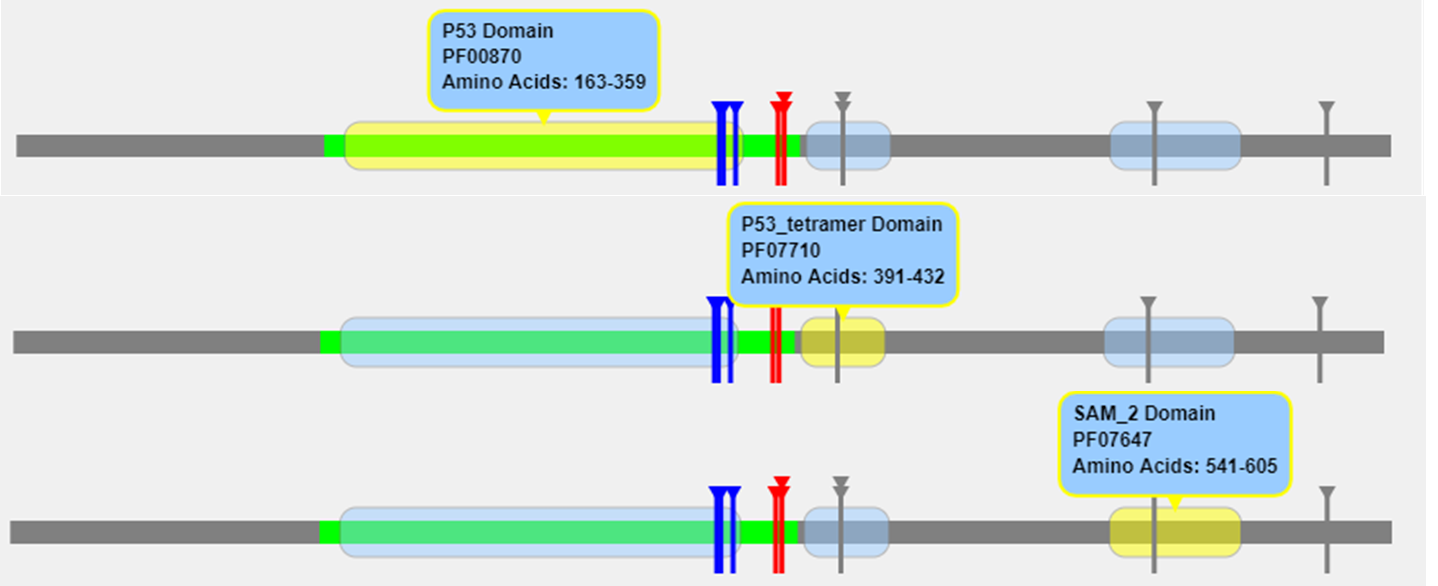


Figure S3. Three domains are shown in yellow color with blue box labelling after structural analysis with Mutation 3D. Vertical sticks shows the mutation in different domains. P53 domain is the DNA binding domain of TP63. R266Q,R318H,R319H,R337Q,R343Q,C347F, D351G,G349E,D355N, are present in p53 domain or DNA binding domain, R376C, R408C, R408H, R379C, R379H are in p53_tetramer domain and L562R in Sam domain.


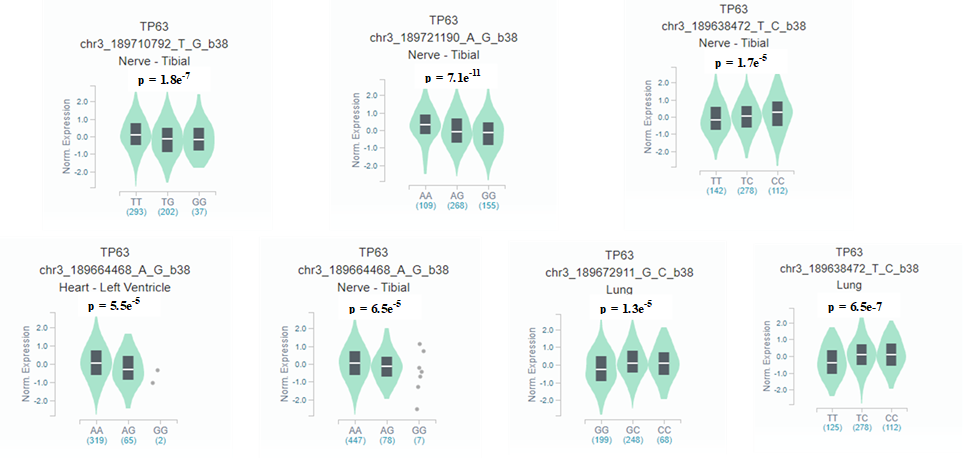


Figure S4. Violin plots of noncoding SNPs for single tissue eQTLs through analyzing with GTEx portal. The plots show the normalized TP63 gene expressions with mutations in different tissues along with significant p values.


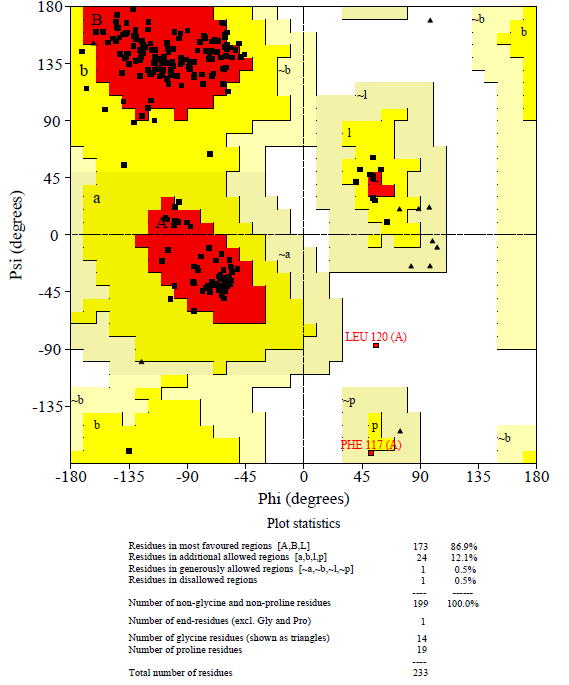
Figure S5: Ramachandran plot statistics of Precheck analysis in PDB sum server for 3D structure of TP63 protein :2RMN.A,B,L denote the alpha, beta, and loop structures in protein.
